# Supplementary material
Source: ML conference proceedings conference paper supplement (https://openaccess.thecvf.com/content/CVPR2023/html/Dong_Rethinking_Optical_Flow_CVPR_2023_paper.html)
Supplement: Supplementary file 1 [file Dong_Rethinking_Optical_Flow_CVPR_2023_supplemental.pdf]

# Supplementary of “Rethinking Optical Flow from Geometric Matching Consistent Perspective”

Qiaole Dong\*, Chenjie Cao\*, Yanwei Fu†  
 School of Data Science, Fudan University

{qldong18, 20110980001, yanweifu}@fudan.edu.cn

## 1. Details of QuadTree Attention

In the Feature Matching Extractor (FME), we employ the QuadTree attention [5] to enhance the feature. Specifically, given the image feature  $F_1, F_2$  from ResNet-16, 8 stacked QuadTree attention blocks (4 self-attention and 4 cross-attention blocks) are incorporated into FME to enhance  $F_1$  and  $F_2$ . We first linear project  $F_1$  and  $F_2$  to query  $Q$ , key  $K$ , and value  $V$ . Take cross-attention as an example:

$$Q = W_q F_1, \quad (1)$$

$$K = W_k F_2, \quad (2)$$

$$V = W_v F_2, \quad (3)$$

where  $W_q, W_k, W_v$  are learnable parameters. We then construct 3-level pyramids for query  $Q$ , key  $K$ , and value  $V$  by average pooling. After computing attention scores at the coarse level:

$$A = \text{Softmax}\left(\frac{QK^T}{\sqrt{C}}\right), \quad (4)$$

we select the top  $k$  key tokens with the highest attention scores for each query token. At the finer level, query sub-tokens only need to be evaluated with those key sub-tokens that correspond to one of the selected  $k$  key tokens at the coarse level. This process is repeated until reaches the finest level. We finally weighted average all selected value tokens at all levels through learnable weight and attention scores. And  $k$  is set to 16 for the coarsest level, and 8 for the remaining levels.

## 2. Tile Technique

As KITTI owns a much smaller aspect ratio, we use the tile technique [2, 3]. Specifically, given a test image with size  $(H_{test}, W_{test})$ , we split it into several patches according to training image size  $(H_{train}, W_{train})$ . For example, it results in two patches starting at  $(0, 0)$  and  $(0, W_{test} - W_{train})$  if  $H_{test} \leq H_{train}$ ; and four patches starting

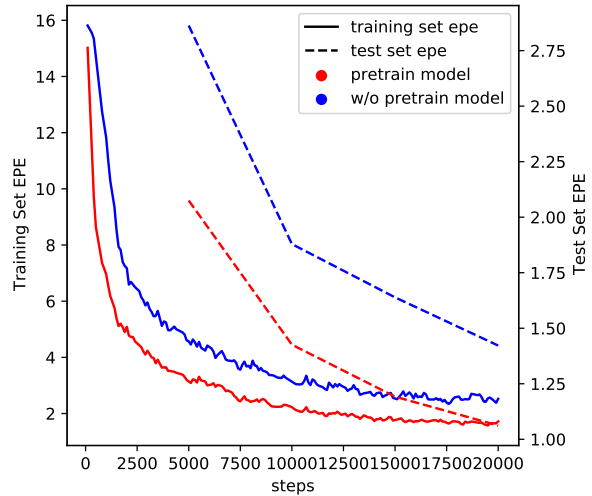

Figure 1. EPE graph at early iterations on C+T pre-training.

at  $(0, 0)$ ,  $(H_{test} - H_{train}, 0)$ ,  $(H_{test} - H_{train}, W_{test} - W_{train})$ , and  $(0, W_{test} - W_{train})$  otherwise. For pixels covered by several patches, we weighted average the flows from these patches and get the final results. The weight is computed from the pixel’s normalized distances  $d_{u,v}$  to the corresponding patch center:

$$d_{u,v} = \|(u/H_{train} - 0.5, v/W_{train} - 0.5)\|_2, \quad (5)$$

where  $(u, v)$  is the pixel’s 2D index within each patch. And we use the Gaussian probability density function to get the final weight for each patch:

$$w_{u,v} = \frac{1}{\sqrt{2\pi}\sigma} \exp\left(-\frac{d_{u,v}^2}{2\sigma^2}\right), \quad (6)$$

where  $\sigma = 0.05$ .

## 3. How much does the Megadepth pretraining provide a good starting point?

We further provide an EPE graph at early iterations on C+T pre-training, for the Megadepth-trained model and a

\*Equal contributions.

†Corresponding author.

model from the scratch. Pretrain indeed provides a much better starting point and converges to lower error on training/test set as shown in Fig. 1.

Besides, as we only pretrain feature encoder by GIM, flow decoder is still learned from scratch on flow data. Directly finetuning model on C+T+S+K+H can result in poor performance (1.63 and 2.77 on Clean and Final of Sintel test set respectively) and serious grid artifacts around motion boundary. So the synthetic dataset pretraining (C+T) is still necessary for our method.

#### 4. More Qualitative Comparison

More qualitative results on Sintel test set and KITTI set are compared between our MatchFlow(G) and GMA [4] are given in Fig. 2 and Fig. 3. As these samples from Sintel test set have no ground-truth optical flows, we can not give the AEPE and replace the ground-truth flows with matching frames in the second column in Fig. 2. We highlight the areas where our MatchFlow(G) beats GMA [4]. Please zoom in for more details.

In addition, we provide qualitative comparison with GMA [4] on HD video from DAVIS [1] test set. We test models on 1080p (1088x1920) resolution video and set the GRU iterations to 12 for both models. We do not use tile technique [3] here. Both models are trained on Sintel. Fig. 4 shows that our model exhibits clearer details (first and third rows) and performs better on textureless regions (second row). Please zoom in for more details.

#### 5. Method of Correlation Volume Visualization

We visualize the correlation volume following GM-FlowNet [6]. Specifically, given 4D correlation volume:  $C \in \mathbb{R}^{H \times W \times H \times W}$ , where  $i, j$  indicate the index of feature map  $F_1$  and  $F_2$ ;  $H, W$  indicate 1/8 height and width of the input image, we extract the local correlation map  $F_i$  for point  $i = (u, v)$  around the ground-truth optical flow  $f_{gt} = (f_{gt}^1, f_{gt}^2)$  as follows:

$$F_i = C(i, (u + f_{gt}^1 + x, v + f_{gt}^2 + y)) \in \mathbb{R}^{1 \times 1 \times 11 \times 11}, \\ -5 \leq x \leq 5, -5 \leq y \leq 5. \quad (7)$$

As  $H, W$  indicate 1/8 height and width of the input image, a local  $11 \times 11$  window in  $C$  corresponds to  $88 \times 88$  local window in input image. We then normalize the local correlation map by *Softmax*:

$$\hat{F}_i = \text{Softmax}(F_i). \quad (8)$$

Finally, we average  $\hat{F}_i$  on all points within different region on 100 Sintel final pass images. The results are shown in Fig. 4 of main paper.

#### 6. Screenshots of Sintel and KITTI Results

We provide anonymous screenshots of Sintel and KITTI results on the test sever in Fig. 5 and Fig. 6. Our method ranks first on Sintel Clean pass and sceond on Sintel Final pass among all published approaches. Besides, we also achieve great performance improvement on KITTI test set. These results signifies the effectiveness of our approach.

#### References

- [1] Sergi Caelles, Jordi Pont-Tuset, Federico Perazzi, Alberto Montes, Kevis-Kokitsi Maninis, and Luc Van Gool. The 2019 davis challenge on vos: Unsupervised multi-object segmentation. *arXiv*, 2019. 2, 4
- [2] Zhaoyang Huang, Xiaoyu Shi, Chao Zhang, Qiang Wang, Ka Chun Cheung, Hongwei Qin, Jifeng Dai, and Hongsheng Li. Flowformer: A transformer architecture for optical flow. *arXiv preprint arXiv:2203.16194*, 2022. 1
- [3] Andrew Jaegle, Sebastian Borgeaud, Jean-Baptiste Alayrac, Carl Doersch, Catalin Ionescu, David Ding, Skanda Koppula, Daniel Zoran, Andrew Brock, Evan Shelhamer, et al. Perceiver io: A general architecture for structured inputs & outputs. *arXiv preprint arXiv:2107.14795*, 2021. 1, 2
- [4] Shihao Jiang, Dylan Campbell, Yao Lu, Hongdong Li, and Richard Hartley. Learning to estimate hidden motions with global motion aggregation. In *Proceedings of the IEEE/CVF International Conference on Computer Vision*, pages 9772–9781, 2021. 2
- [5] Shitao Tang, Jiahui Zhang, Siyu Zhu, and Ping Tan. Quadtree attention for vision transformers. *arXiv preprint arXiv:2201.02767*, 2022. 1
- [6] Shiyu Zhao, Long Zhao, Zhixing Zhang, Enyu Zhou, and Dimitris Metaxas. Global matching with overlapping attention for optical flow estimation. In *Proceedings of the IEEE/CVF Conference on Computer Vision and Pattern Recognition*, pages 17592–17601, 2022. 2

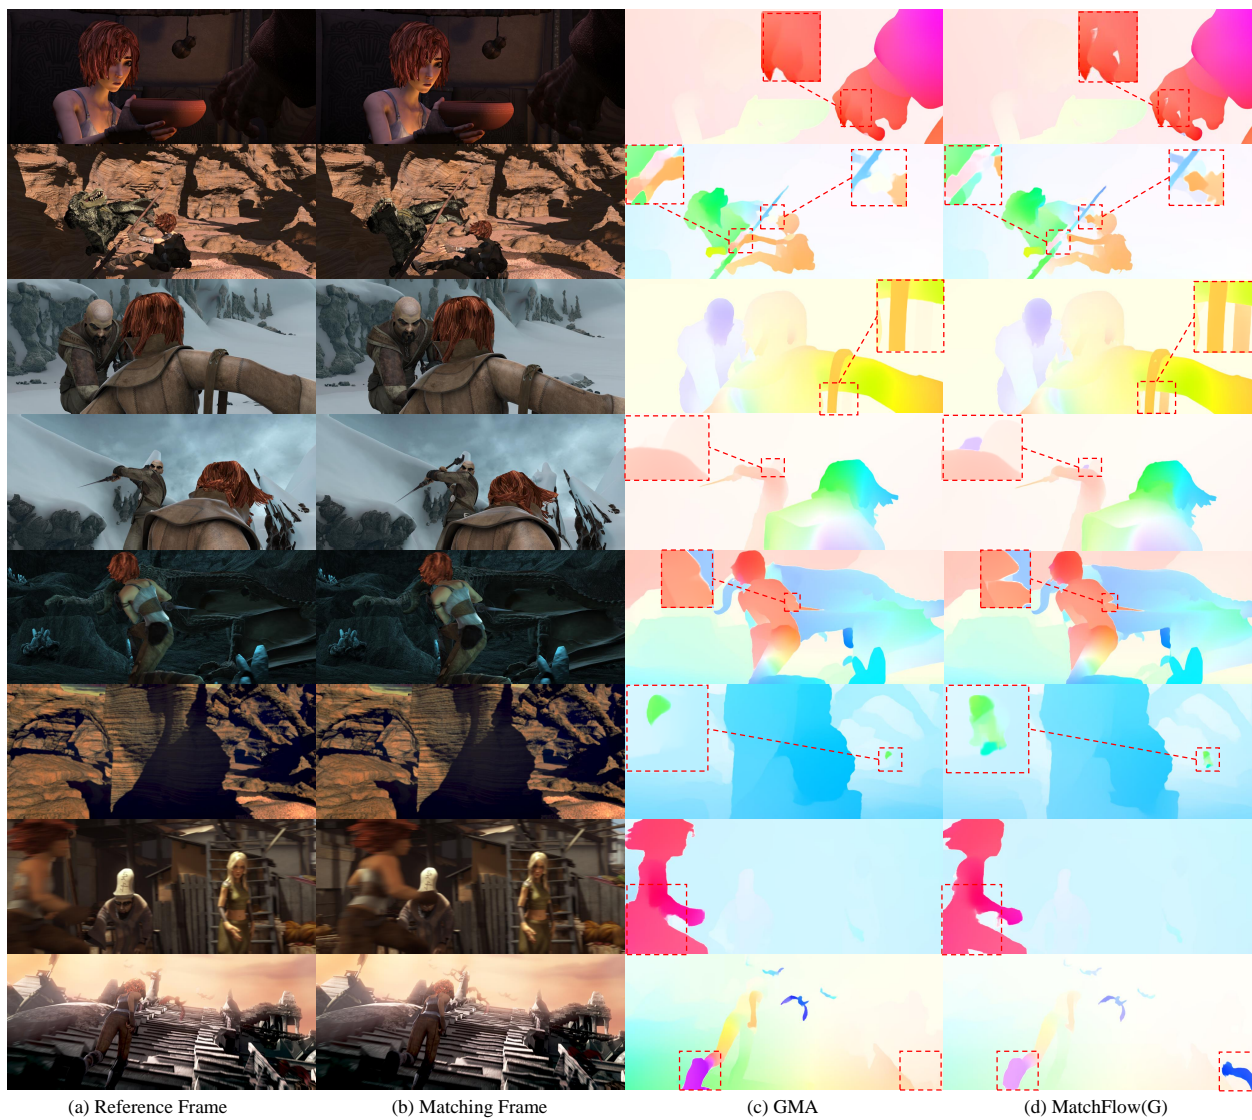

Figure 2. More qualitative results on Sintel test set. First four rows are from clean pass, and the last four from final pass. Ground-truth optical flows are not available and are not shown. Red dashed boxes mark the regions of substantial improvements. Please zoom in for details.



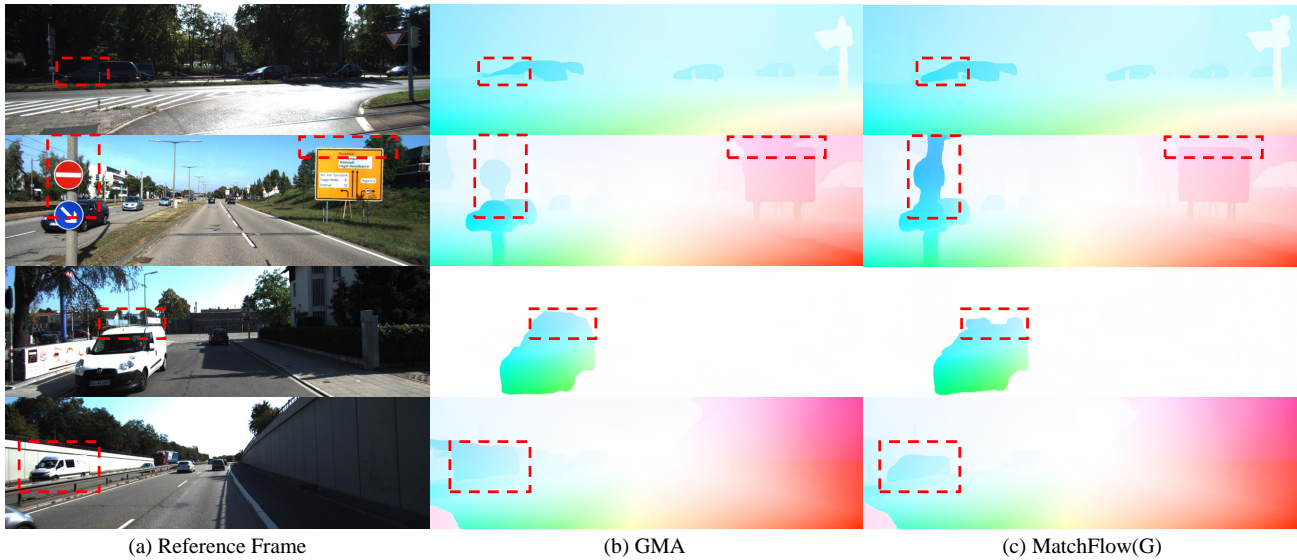

Figure 3. More qualitative results on KITTI test set. Red dashed boxes mark the regions of substantial improvements. Please zoom in for details.

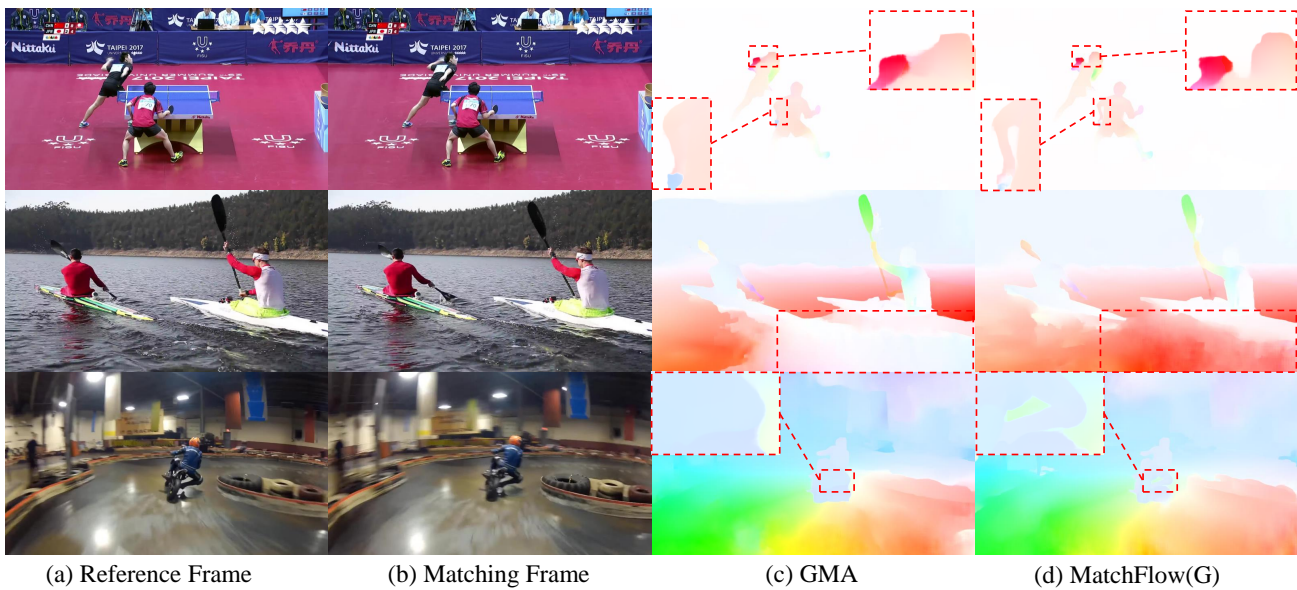

Figure 4. Qualitative results on 1080p (1088x1920) DAVIS [1] test set. Red dashed boxes mark the regions of substantial improvements. Please zoom in for details.

Final Clean

|                                | EPE all | EPE matched | EPE unmatched | d0-10 | d10-60 | d60-140 | s0-10 | s10-40 | s40+  |                                   |
|--------------------------------|---------|-------------|---------------|-------|--------|---------|-------|--------|-------|-----------------------------------|
| GroundTruth <sup>[1]</sup>     | 0.000   | 0.000       | 0.000         | 0.000 | 0.000  | 0.000   | 0.000 | 0.000  | 0.000 | <a href="#">Visualize Results</a> |
| GMFlow+ <sup>[2]</sup>         | 1.028   | 0.335       | 6.680         | 0.868 | 0.264  | 0.183   | 0.227 | 0.689  | 5.826 | <a href="#">Visualize Results</a> |
| GMFlow_RVC <sup>[3]</sup>      | 1.055   | 0.420       | 6.227         | 1.084 | 0.326  | 0.227   | 0.302 | 0.754  | 5.513 | <a href="#">Visualize Results</a> |
| FlowFormer++ <sup>[4]</sup>    | 1.073   | 0.390       | 6.635         | 1.099 | 0.296  | 0.179   | 0.252 | 0.796  | 5.810 | <a href="#">Visualize Results</a> |
| SplatFlow <sup>[5]</sup>       | 1.119   | 0.511       | 6.061         | 1.410 | 0.394  | 0.247   | 0.272 | 0.868  | 5.915 | <a href="#">Visualize Results</a> |
| MatchFlow_GMA <sup>[6]</sup>   | 1.164   | 0.431       | 7.130         | 1.259 | 0.311  | 0.197   | 0.265 | 0.845  | 6.387 | <a href="#">Visualize Results</a> |
| RAFT-it+_RVC <sup>[7]</sup>    | 1.187   | 0.441       | 7.260         | 1.301 | 0.338  | 0.181   | 0.242 | 0.834  | 6.723 | <a href="#">Visualize Results</a> |
| FlowFormer <sup>[8]</sup>      | 1.196   | 0.406       | 7.627         | 1.137 | 0.310  | 0.192   | 0.253 | 0.800  | 6.826 | <a href="#">Visualize Results</a> |
| MS_RAFT+_RVC <sup>[9]</sup>    | 1.232   | 0.400       | 8.021         | 1.101 | 0.353  | 0.142   | 0.159 | 0.631  | 8.020 | <a href="#">Visualize Results</a> |
| SKII <sup>[10]</sup>           | 1.302   | 0.532       | 7.571         | 1.494 | 0.422  | 0.225   | 0.278 | 0.931  | 7.269 | <a href="#">Visualize Results</a> |
| SKFlow <sup>[11]</sup>         | 1.312   | 0.567       | 7.379         | 1.510 | 0.453  | 0.231   | 0.300 | 0.969  | 7.159 | <a href="#">Visualize Results</a> |
| MatchFlow_RAFT <sup>[12]</sup> | 1.332   | 0.466       | 8.390         | 1.305 | 0.357  | 0.208   | 0.274 | 0.881  | 7.670 | <a href="#">Visualize Results</a> |
| MCPFlow_RVC <sup>[13]</sup>    | 1.346   | 0.480       | 8.405         | 1.268 | 0.401  | 0.218   | 0.263 | 0.816  | 8.004 | <a href="#">Visualize Results</a> |
| CGCV <sup>[14]</sup>           | 1.351   | 0.556       | 7.829         | 1.477 | 0.459  | 0.254   | 0.295 | 0.920  | 7.626 | <a href="#">Visualize Results</a> |
| MS_RAFT <sup>[15]</sup>        | 1.374   | 0.479       | 8.678         | 1.340 | 0.379  | 0.224   | 0.221 | 0.767  | 8.572 | <a href="#">Visualize Results</a> |
| SwinTR-RAFT <sup>[16]</sup>    | 1.379   | 0.529       | 8.304         | 1.272 | 0.430  | 0.277   | 0.325 | 0.917  | 7.726 | <a href="#">Visualize Results</a> |
| GMA <sup>[17]</sup>            | 1.388   | 0.582       | 7.963         | 1.537 | 0.461  | 0.278   | 0.331 | 0.963  | 7.662 | <a href="#">Visualize Results</a> |

(a) Screenshot for Sintel Clean results

Final Clean

|                                | EPE all | EPE matched | EPE unmatched | d0-10 | d10-60 | d60-140 | s0-10 | s10-40 | s40+   |                                   |
|--------------------------------|---------|-------------|---------------|-------|--------|---------|-------|--------|--------|-----------------------------------|
| GroundTruth <sup>[1]</sup>     | 0.000   | 0.000       | 0.000         | 0.000 | 0.000  | 0.000   | 0.000 | 0.000  | 0.000  | <a href="#">Visualize Results</a> |
| FlowFormer++ <sup>[2]</sup>    | 1.943   | 0.878       | 10.627        | 2.302 | 0.720  | 0.384   | 0.438 | 1.404  | 10.712 | <a href="#">Visualize Results</a> |
| SplatFlow <sup>[3]</sup>       | 2.072   | 1.063       | 10.285        | 2.717 | 0.851  | 0.452   | 0.508 | 1.538  | 11.109 | <a href="#">Visualize Results</a> |
| FlowFormer <sup>[4]</sup>      | 2.120   | 0.986       | 11.368        | 2.474 | 0.791  | 0.453   | 0.519 | 1.470  | 11.638 | <a href="#">Visualize Results</a> |
| SKII <sup>[5]</sup>            | 2.160   | 1.049       | 11.215        | 2.754 | 0.886  | 0.458   | 0.465 | 1.624  | 11.856 | <a href="#">Visualize Results</a> |
| GMFlow_RVC <sup>[6]</sup>      | 2.218   | 1.085       | 11.437        | 2.327 | 0.813  | 0.651   | 0.539 | 1.433  | 12.428 | <a href="#">Visualize Results</a> |
| SKFlow <sup>[7]</sup>          | 2.241   | 1.128       | 11.314        | 2.735 | 0.880  | 0.507   | 0.564 | 1.625  | 12.048 | <a href="#">Visualize Results</a> |
| MCPFlow_RVC <sup>[8]</sup>     | 2.350   | 1.094       | 12.595        | 2.702 | 0.870  | 0.507   | 0.517 | 1.552  | 13.373 | <a href="#">Visualize Results</a> |
| GMFlow+ <sup>[9]</sup>         | 2.367   | 1.095       | 12.739        | 2.097 | 0.808  | 0.708   | 0.453 | 1.328  | 14.377 | <a href="#">Visualize Results</a> |
| MatchFlow_GMA <sup>[10]</sup>  | 2.373   | 1.061       | 13.070        | 2.604 | 0.863  | 0.485   | 0.504 | 1.508  | 13.735 | <a href="#">Visualize Results</a> |
| CRAFT <sup>[11]</sup>          | 2.417   | 1.163       | 12.637        | 2.837 | 1.012  | 0.547   | 0.538 | 1.623  | 13.656 | <a href="#">Visualize Results</a> |
| CGCV <sup>[12]</sup>           | 2.430   | 1.149       | 12.881        | 2.821 | 1.014  | 0.525   | 0.500 | 1.657  | 13.873 | <a href="#">Visualize Results</a> |
| GMA-FS <sup>[13]</sup>         | 2.441   | 1.203       | 12.551        | 2.777 | 0.961  | 0.594   | 0.587 | 1.646  | 13.576 | <a href="#">Visualize Results</a> |
| ErrorMatch-GMA <sup>[14]</sup> | 2.461   | 1.228       | 12.519        | 2.799 | 1.047  | 0.642   | 0.541 | 1.701  | 13.821 | <a href="#">Visualize Results</a> |
| AGFlow <sup>[15]</sup>         | 2.469   | 1.221       | 12.643        | 2.892 | 0.991  | 0.698   | 0.560 | 1.692  | 13.816 | <a href="#">Visualize Results</a> |
| GMA <sup>[16]</sup>            | 2.470   | 1.241       | 12.501        | 2.863 | 1.057  | 0.653   | 0.566 | 1.817  | 13.492 | <a href="#">Visualize Results</a> |
| RAFT-OCTC <sup>[17]</sup>      | 2.574   | 1.243       | 13.435        | 2.880 | 1.045  | 0.667   | 0.578 | 1.701  | 14.594 | <a href="#">Visualize Results</a> |

(b) Screenshot for Sintel Final results

Figure 5. Screenshots for Sintel Clean and Final results on the test server.

|                                                                                                                                                                                                  |                                   |                                                                                     |        |         |        |          |        |                                |                          |
|--------------------------------------------------------------------------------------------------------------------------------------------------------------------------------------------------|-----------------------------------|-------------------------------------------------------------------------------------|--------|---------|--------|----------|--------|--------------------------------|--------------------------|
| 22                                                                                                                                                                                               | <a href="#">SwinTR-RAFT</a>       | <a href="#">code</a>                                                                | 4.32 % | 6.05 %  | 4.61 % | 100.00 % | 0.6 s  | 8 cores @ 2.5 Ghz (Python)     | <input type="checkbox"/> |
| 23                                                                                                                                                                                               | <a href="#">MatchFlow(G)</a>      |                                                                                     | 4.33 % | 6.11 %  | 4.63 % | 100.00 % | 0.3 s  | GPU (Python)                   | <input type="checkbox"/> |
| 24                                                                                                                                                                                               | <a href="#">RealFlow</a>          |                                                                                     | 4.20 % | 6.76 %  | 4.63 % | 100.00 % | 0.2 s  | 8 cores @ 2.5 Ghz (Python)     | <input type="checkbox"/> |
| 25                                                                                                                                                                                               | <a href="#">DGA-Flow</a>          |                                                                                     | 4.34 % | 6.11 %  | 4.64 % | 100.00 % | 0.2 s  | 1 core @ 2.5 Ghz (Python)      | <input type="checkbox"/> |
| 26                                                                                                                                                                                               | <a href="#">FCTR-m</a>            |                                                                                     | 4.45 % | 5.63 %  | 4.65 % | 100.00 % | 0.2 s  | GPU @ 2.5 Ghz (Python)         | <input type="checkbox"/> |
| 27                                                                                                                                                                                               | <a href="#">FlowNAS-RAFT-K</a>    |                                                                                     | 4.36 % | 6.25 %  | 4.67 % | 100.00 % | 0.19 s | GPU @ 2.5 Ghz (Python)         | <input type="checkbox"/> |
| 28                                                                                                                                                                                               | <a href="#">FlowFormer</a>        | <a href="#">code</a>                                                                | 4.37 % | 6.18 %  | 4.68 % | 100.00 % | 0.3 s  | GPU (Python)                   | <input type="checkbox"/> |
| Z. Huang, X. Shi, C. Zhang, Q. Wang, K. Cheung, H. Qin, J. Dai and H. Li: <a href="#">FlowFormer: A Transformer Architecture for Optical Flow</a> . European conference on computer vision 2022. |                                   |                                                                                     |        |         |        |          |        |                                |                          |
| 29                                                                                                                                                                                               | <a href="#">CRAFT-intramodes2</a> | <a href="#">code</a>                                                                | 4.35 % | 6.35 %  | 4.68 % | 100.00 % | 0.2 s  | 1 core @ 2.5 Ghz (Python)      | <input type="checkbox"/> |
| 30                                                                                                                                                                                               | <a href="#">TPCV+RAFT</a>         |    | 4.53 % | 5.52 %  | 4.69 % | 100.00 % | 0.2 s  | 1 core 2.5ghz gpu              | <input type="checkbox"/> |
| 31                                                                                                                                                                                               | <a href="#">MatchFlow(R)</a>      |                                                                                     | 4.51 % | 5.78 %  | 4.72 % | 100.00 % | 0.26 s | GPU (Python)                   | <input type="checkbox"/> |
| 32                                                                                                                                                                                               | <a href="#">UberATG-DRISE</a>     |  | 3.59 % | 10.40 % | 4.73 % | 100.00 % | 0.75 s | CPU+GPU @ 2.5 Ghz (Python)     | <input type="checkbox"/> |
| W. Ma, S. Wang, R. Hu, Y. Xiong and R. Urtaşun: <a href="#">Deep Rigid Instance Scene Flow</a> . CVPR 2019.                                                                                      |                                   |                                                                                     |        |         |        |          |        |                                |                          |
| 33                                                                                                                                                                                               | <a href="#">SKII</a>              |                                                                                     | 4.57 % | 5.66 %  | 4.75 % | 100.00 % | 0.3 s  | 1 core @ 2.5 Ghz (Python)      | <input type="checkbox"/> |
| 34                                                                                                                                                                                               | <a href="#">ErrorMatch-RAFT</a>   | <a href="#">code</a>                                                                | 4.46 % | 6.23 %  | 4.75 % | 100.00 % | 0.2 s  | 1 core @ 2.5 Ghz (Python)      | <input type="checkbox"/> |
| 35                                                                                                                                                                                               | <a href="#">ErrorMatch-GMA</a>    | <a href="#">code</a>                                                                | 4.53 % | 5.87 %  | 4.75 % | 100.00 % | 0.3 s  | 1 core @ 2.5 Ghz (C/C++)       | <input type="checkbox"/> |
| 36                                                                                                                                                                                               | <a href="#">Super</a>             |                                                                                     | 4.43 % | 6.43 %  | 4.76 % | 100.00 % | 0.07 s | GPU @ 2.5 Ghz (Python)         | <input type="checkbox"/> |
| 37                                                                                                                                                                                               | <a href="#">RAFT-A</a>            | <a href="#">code</a>                                                                | 4.54 % | 5.99 %  | 4.78 % | 100.00 % | 0.7 s  | GPU @ 2.5 Ghz (Python + C/C++) | <input type="checkbox"/> |
| D. Sun, D. Vlasic, C. Herrmann, V. Jampani, M. Krainin, H. Chang, R. Zabih, W. Freeman and C. Liu: <a href="#">AutoFlow: Learning a Better Training Set for Optical Flow</a> . CVPR 2021.        |                                   |                                                                                     |        |         |        |          |        |                                |                          |
| 38                                                                                                                                                                                               | <a href="#">CRAFT</a>             | <a href="#">code</a>                                                                | 4.58 % | 5.85 %  | 4.79 % | 100.00 % | 0.2 s  | GPU @ 2.5 Ghz (Python)         | <input type="checkbox"/> |
| X. Sui, S. Li, X. Geng, Y. Wu, X. Xu, Y. Liu, R. Goh and H. Zhu: <a href="#">CRAFT: Cross-Attentional Flow Transformers for Robust Optical Flow</a> . CVPR 2022.                                 |                                   |                                                                                     |        |         |        |          |        |                                |                          |
| 39                                                                                                                                                                                               | <a href="#">GMFlowNet</a>         | <a href="#">code</a>                                                                | 4.39 % | 6.84 %  | 4.79 % | 100.00 % | 0.5 s  | GPU @ 2.5 Ghz (Python)         | <input type="checkbox"/> |
| S. Zhao, L. Zhao, Z. Zhang, E. Zhou and D. Metaxas: <a href="#">Global Matching with Overlapping Attention for Optical Flow Estimation</a> . CVPR 2022.                                          |                                   |                                                                                     |        |         |        |          |        |                                |                          |

Figure 6. Screenshots for KITTI optical flow evaluation 2015 results on the test server.
